# Supplementary material for: Developmental effects on sleep–wake patterns in infants receiving a cow’s milk-based infant formula with an added prebiotic blend: a Randomized Controlled Trial
Source: PubMed Central journal article supplement (PMC8119237; doi:10.1038/s41390-020-1044-x), 2020-07-02
Supplement: 41390_2020_1044_MOESM1_ESM.pdf [file 41390_2020_1044_MOESM1_ESM.pdf]

Study Visit (Check one) :  Baseline  Visit 2  Visit 3

Recording Period (Check one):  First 24-hour period  Second 24-hour period  Third 24-hour period

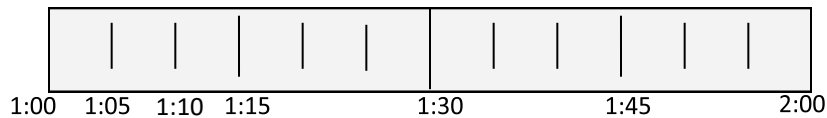

Example above has been enlarged to show that each tick mark represents a 5 minute interval

Date of First Recording  
on this page:

\_\_\_ / \_\_\_ / \_\_\_\_\_

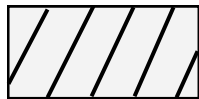

CRYING/FUSSING

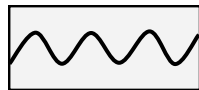

AWAKE & CONTENT

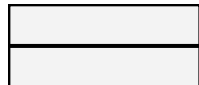

EVERYTHING ELSE (e.g.,  
SLEEPING, EATING,  
CANNOT REMEMBER)

**MORNING**

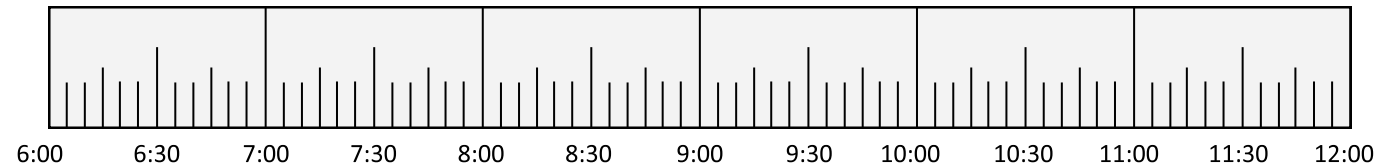

**AFTERNOON**

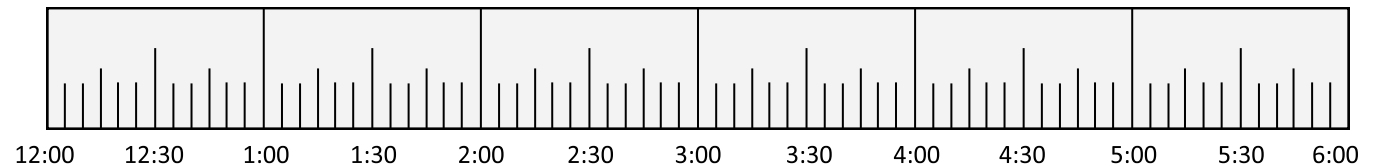

**EVENING**

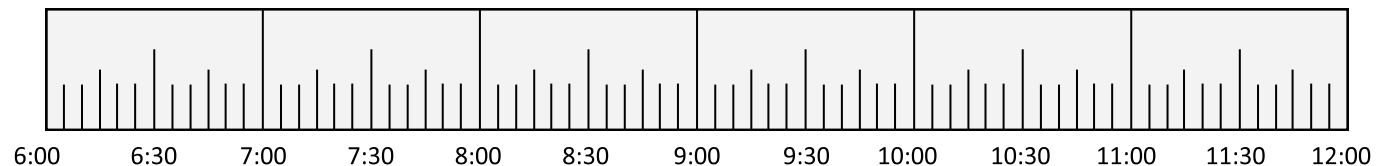

**NIGHT**

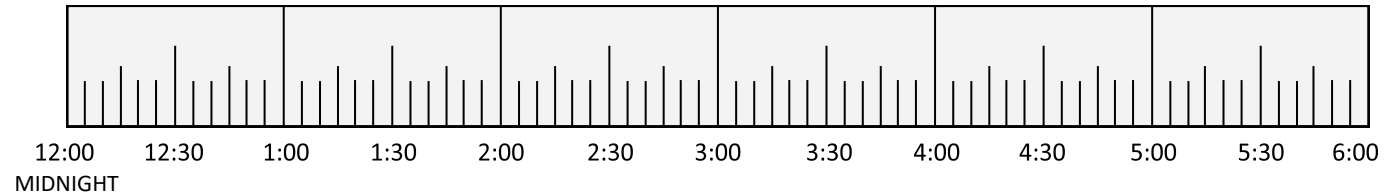

**Supplemental Figure:** Each 24-h period was represented by four 6-h time bars (5 min subdivisions) corresponding to: morning (6:00 a.m. to noon), afternoon (noon to 6:00 p.m.), evening (6:00 p.m. to midnight), and night (midnight to 6:00 a.m.). Crying/fussing and awake & content behaviors were recorded in 5-min increments with parents encouraged to fill in the diary every 2 to 3 hours, or at the same time as a repetitive activity, such as feeding or changing a diaper. All rights reserved Ronald G Barr, MDCM. Adapted from Barr RG, et al. 1988 Parental diary of infant cry and fuss behaviour. Arch Dis Child 63:380-387 with permission.
